# Supplementary material
Source: publisher site journal article supplement (https://www.degruyterbrill.com/publication/journal_key/CPPM/downloadAsset/CPPM_Instructions%20for%20Authors%20CPPM.pdf)
Supplement: Supplementary file 1 [file CPPM_Instructions%20for%20Authors%20CPPM.pdf]

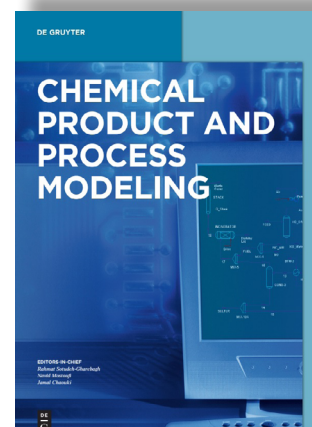

# Chemical Product and Process Modeling

## Table of Contents

|                                                                                                            |   |
|------------------------------------------------------------------------------------------------------------|---|
| <b>Scope and general policies of the journal</b> .....                                                     | 2 |
| Scope.....                                                                                                 | 2 |
| Article (manuscript) categories .....                                                                      | 2 |
| Special issues and special issue section .....                                                             | 2 |
| <b>Submission of manuscripts</b> .....                                                                     | 3 |
| ORCID.....                                                                                                 | 3 |
| Submission declaration and verification .....                                                              | 3 |
| Scientific misconduct.....                                                                                 | 3 |
| Responsible authorship and research integrity .....                                                        | 3 |
| Research data availability .....                                                                           | 4 |
| <b>Peer review, turnaround times and pre-publication policies</b> .....                                    | 4 |
| Rejection of manuscripts and peer review information .....                                                 | 4 |
| Appeals.....                                                                                               | 4 |
| Turnaround times .....                                                                                     | 5 |
| Pre-publication policy .....                                                                               | 5 |
| Inclusive language policy.....                                                                             | 5 |
| <b>Post-acceptance</b> .....                                                                               | 5 |
| Galley proofs.....                                                                                         | 5 |
| Issue-based publication .....                                                                              | 5 |
| Author PDF .....                                                                                           | 5 |
| Repository policy .....                                                                                    | 6 |
| Copyright .....                                                                                            | 6 |
| Open access in hybrid journals.....                                                                        | 6 |
| Article Processing Charges (APCs).....                                                                     | 6 |
| Open access articles on ResearchGate .....                                                                 | 6 |
| <b>Ethical conduct of research</b> .....                                                                   | 6 |
| Acknowledgments .....                                                                                      | 7 |
| Authorization for the use of human subjects – Research ethics.....                                         | 7 |
| Authorization for the use of experimental animals and wildlife in natural settings – Research ethics ..... | 7 |
| Informed consent .....                                                                                     | 7 |
| Author contributions .....                                                                                 | 8 |
| Conflict of interest.....                                                                                  | 8 |
| Research funding.....                                                                                      | 8 |

## Scope and general policies of the journal

### Scope

*Chemical Product and Process Modeling (CPPM)* is a quarterly journal that publishes theoretical and applied research on product and process design modeling, simulation and optimization. Thanks to its international editorial board, the journal assembles the best papers from around the world on to cover the gap between product and process. The journal brings together chemical and process engineering researchers, practitioners, and software developers in a new forum for the international modeling and simulation community.

Topics:

- equation oriented and modular simulation
- optimization technology for process and materials design, new modeling techniques
- shortcut modeling and design approaches
- performance of commercial and in-house simulation and optimization tools
- challenges faced in industrial product and process simulation and optimization
- computational fluid dynamics
- environmental process, food and pharmaceutical modeling
- topics drawn from the substantial areas of overlap between modeling and mathematics applied to chemical products and processes
- sustainability in process modeling and simulation
- process modeling through various dimensions of data science and analytics, including but not limited to machine learning, statistical analysis, and data visualization

Targeted audience: researchers and professionals working in the fields of chemical product and process design, simulation and modelling.

*CPPM* is English-language, hybrid journal, published six times a year.

### Article (manuscript) categories

- Editorial Note
- Research Article
- Review Article
- Short Communication
- R&D Note
- Technical Note

### Special issues and special issue section

CPPM publishes special and thematic issues focused on important and emerging topics in the field of study. Ideas for special issues are proposed by the journal's editorial board, but the journal will also consider proposals for special issues submitted by members of the wider research community. All proposals are assessed for quality and relevance by the Editors-in-Chief and the editorial office.

The journal has established a rigorous process to ensure that any special issue manuscripts follow the same high-quality standards and peer review processes as regular manuscripts. Each special issue has (a) dedicated Guest Editor(s) who is/are responsible for the coordination of the peer review process of any manuscripts submitted to the special issue in the online submission system. The Editors-in-Chief or the editorial office check(s) the initial manuscript and assigns it to the appropriate Guest Editor. The Guest Editor invites reviewers and makes recommendations on revisions and final decisions. The Editors-in-Chief have oversight of the entire process within the online submission system and are responsible for the final decision on all manuscripts.

## Submission of manuscripts

- Submit manuscripts exclusively online at: <http://mc.manuscriptcentral.com/dgcppm>

We strongly recommend that authors register with institutional email addresses and do not use private email addresses. Institutional email addresses serve as strong authenticity markers. In addition, institutional email domains identify authors who are entitled to open access discounts per institutional agreements with the publisher. Not using an institutional email address may result in delayed or missed open access publication.

A cover letter must be submitted for each manuscript upon first submission. It should contain a brief statement by the authors as to the element of novelty upon which they base their request for publication in CPPM. Please address the cover letter to the Editor-in-Chief. Revised manuscripts must be accompanied by a point-by-point reply to the reviewers' comments. Major changes in the revised manuscript must be highlighted, preferably in tracked changes mode. A second, clean version should always be submitted for major changes.

## ORCID

ORCID (Open Researcher and Contributor ID) is a non-profit, publisher-independent system that is used to uniquely identify academics and their publications. Detailed information about ORCID can be found at [www.orcid.org/](http://www.orcid.org/). Providing an ORCID number for each author is strongly recommended. ORCID numbers should be listed on the title page.

## Submission declaration and verification

For information on plagiarism, please refer to [COPE – Committee of Publication Ethics](#).

Each manuscript submission declares that the manuscript (or one with substantially the same content, by any of the authors) has not been previously published in any language anywhere and that it is not under simultaneous consideration by any other journal. Exceptions are listed in section "Pre-publication policy". Furthermore, all co-authors must have agreed to its publication and have given the corresponding author the authority to act on their behalf in all matters pertaining to publication. The corresponding author is responsible for informing the co-authors of the manuscript status throughout the submission, review, and production process.

To exclude potential overlap with prior publication(s), your manuscript is systematically checked by the plagiarism checker Crossref Similarity Check ([iThenticate](#)). Previously published material must be referenced appropriately in the manuscript, regardless of whether the material was previously published in a subscription based, hybrid or open access journal, or in another language.

## Scientific misconduct

Only articles that have not been or will not be published elsewhere will be published in the journal, excluding articles that fall under the publisher's pre-publication policy (see section "Pre-publication policy" below). Multiple submissions/publications or redundant publications (i.e., republication of data already published by the same authors) will be rejected. If identified after publication, the journal reserves the right to publish a retraction note. In any case, editors will follow the [Committee on Publication Ethics](#) (COPE's) Code of Conduct and implement its advice. For detailed information, please see our [publishing ethics page](#).

## Responsible authorship and research integrity

The authors are responsible for all aspects of the study and will ensure that any questions regarding the accuracy and integrity of any part of the work are adequately investigated and resolved.

With submitting your manuscript to CPPM the authors declare that they are the sole and intellectual authors of the manuscript. We do not accept submissions that name Large Language Models, such as ChatGPT, Artificial Intelligence (AI) and Machine Learning Tools as credited author(s) on a manuscript because such tools cannot take responsibility for the submitted work and therefore cannot be considered as eligible authors. Where such tools or technologies are used as part of the design or methodology of a research study, please specify the tool and the purpose of its use for the conducted research in the Methods section of your manuscript, and if applicable indicate the use of Large Language Models, AI and Machine Learning Tools for manuscript preparation in the [Template for Ethical and Legal Declarations](#). In case of doubt, the Editorial Board reserves the right to ask the authors to submit the raw experimental data.

### Research data availability

CPPM requires authors to follow our [Data Sharing Policy](#), which must comply with the European GDPR (General Data Protection Regulation) rules.

Research data should be made widely available to the research community to demonstrate the robustness and validity of the research presented in the journal, to enable and encourage replication of the results, and to allow the community with opportunities to learn.

We recommend the use of community-endorsed data types. If you assign a persistent identifier to your research data by archiving it in a data repository, other researchers will be able to cite your data as well as your published research article.

Where possible, data should be submitted to discipline-specific, community-recognized repositories. In cases where there is no appropriate discipline-specific resource, data may be submitted to a general data repository. Please see <https://www.re3data.org/>, <https://fairsharing.org/>, or <https://repositoryfinder.datacite.org/> for help finding research data repositories. We strongly recommend using [CoreTrustSeal](#) certified repositories.

To determine whether a research data availability statement is required and what format it must follow, please refer to the specific file for each policy level available on the [Data Sharing Policy](#) website. Detailed information can be found in the “Submit” tab on the journal website.

Please fill in your statement on data availability in the [Template for Ethical and Legal Declarations](#), which is required for submission.

We further recommend citing the data that has been shared in the reference list. Data citations should include a persistent identifier, should be included in the reference list using the minimum information recommended by [DataCite](#) (Dataset Creator, Dataset Title, Publisher [repository], Publication Year, Identifier [e.g. DOI, Handle or ARK]) and follow journal style.

## Peer review, turnaround times and pre-publication policies

### Rejection of manuscripts and peer review information

Submitted manuscripts will be reviewed in a two-step procedure. Firstly, the Editor-in-Chief decides whether the manuscript fulfills the substantive and formal criteria for the further peer review process. The decision is based on the following criteria:

- relevance: the content conforms to the scope and goals of CPPM,
- originality/topicality: the content is sufficiently important and topical to be worthy to be published in CPPM,
- formal correctness: the formal criteria have been met (also in view of the manuscript being written in understandable English),
- ethical guidelines: national and international ethical standards for studies with human and/or animal subjects are fulfilled (where applicable).

In cases where the criteria have not been met, the manuscript will be rejected without peer review.

CPPM is a double-anonymized journal. Manuscripts which fulfill the substantive and formal criteria are reviewed anonymously by at least two independent reviewers selected by the Editors. The authors must provide the names, institution, country, and email addresses of at least four potential reviewers. Reviewers indicated by the authors must be of institutions and countries different from the corresponding author/those of any of the authors. Authors may also provide names of reviewers they wish to exclude from reviewing their manuscripts.

### Appeals

Manuscripts that have been rejected for publication will be reconsidered only at the discretion of the Editor(s). Authors wishing to request reconsideration of a previously rejected manuscript must do so in written form and submit a rebuttal by email to the journal's editorial office. Authors should provide detailed reasons why they believe the manuscript should be reconsidered. If the rebuttal is accepted, the author will be asked to re-submit the manuscript, or the decision will be reversed.

### Turnaround times

CPPM aspires to inform authors of the peer review decision within 3-4 weeks from the submission date. Revised manuscripts should be returned within 6 weeks. Accepted manuscripts will be published online within 2-4 weeks of acceptance.

### Pre-publication policy

The publisher does not consider the following purposes of a paper as pre-publication: publication in the form of a congress abstract, publication as an academic thesis, publication as an electronic preprint on recognized servers such as arXiv, RePEc, bioRxiv, ResearchSquare, etc.

### Inclusive language policy

Inclusive language recognizes diversity, conveys respect for all people, is sensitive to differences and promotes equal opportunities. Content should not make assumptions about readers' beliefs or commitments; should not contain anything that might suggest that one person is superior to another because of age, gender, race, ethnicity, culture, sexual orientation, disability or health condition; and should use inclusive language throughout. Authors should ensure that their writing is free from prejudice, stereotypes, slang, references to the dominant culture and/or cultural assumptions.

We advise the following approach: Aim for gender neutrality by using plural nouns (clinicians, clients, participants) as standard and avoiding "he" or "she", wherever possible. Instead, please use "they". We recommend avoiding the use of descriptors that refer to personal characteristics such as age, gender, race, ethnicity, culture, sexual orientation, disability or health status unless they are relevant and valid.

## Post-acceptance

### Galley proofs

*Online proofreading (Proof Central):* Once the manuscript is accepted for publication, it is forwarded to typesetting. The corresponding author receives the galley proofs in electronic form to check them for editing and typesetting accuracy. Corresponding authors receive an email notification from noreply@degruyter.com, subject: "Check your proof pdf: [journal abbreviation]-xxxx-xxxx" (please carefully check your email inbox as well as your spam folder) with a link to the online proofreading system (Proof Central) through which they can access their galley proofs. The interface is similar to MS Word: authors can edit the text by entering their corrections directly, adding comments, and answering questions from the copy editor. If preferred, authors can also annotate and upload edits to the PDF version.

All instructions for proof corrections, including deadlines, will be given in the email notification, along with a user guide, providing step-by-step instructions for inserting corrections.

Substantial changes to a manuscript accepted for publication will only be considered with the permission of the Editor or after additional peer review. The responsibility for proofreading lies solely with the authors.

According to the publisher's policy, once a manuscript has been accepted, no changes to the author list and manuscript title are allowed (except typos). The publisher's production team is instructed to enforce this policy during the production/proof correction process.

### Issue-based publication

Articles are first published online as DOI citable articles and later assigned to an issue with final page numbers.

### Author PDF

Electronic files of typeset articles in Adobe Acrobat PDF format are provided free of charge. The corresponding author will receive an email notification when the article has been published online along with instructions on how to access the article.

## Repository policy

Policies for sharing published journal articles differ for subscription-based and open access articles. Authors may publish their articles, which are not published under a Creative Commons license (i.e., open access), in a public repository after an embargo period (see the publisher's [Sharing Policy](#)). Only the accepted author version of the manuscript, not the PDF version of the published article, can be published:

Immediately

- via their non-commercial personal website, blog, or social media channels
- by updating a preprint in arXiv, RePEc, bioRxiv, ResearchSquare, etc. with the version of the accepted manuscript
- as a closed deposit via their research institute or institutional repository for internal institutional purposes or as part of an invitation-only research collaboration workgroup
- directly by providing copies to their students or to research collaborators for their personal use
- for private scholarly sharing as part of an invitation-only work group

After an embargo period

- as open deposits to institutional or subject repositories
- to scholarly collaboration networks (SCNs)

## Copyright

Manuscripts submitted to subscription and hybrid journals are accepted on condition of transfer of copyright ([License to Publish](#)) (for U.S. government employees: to the extent transferable) to the publisher. Once the manuscript has been accepted, it may not be published elsewhere without the consent of the copyright holders.

## Open access in hybrid journals

If the authors decide to publish their article open access, they declare consent to place the article under the [Creative Commons Attribution 4.0 International License \(CC-BY-4.0\)](#). The Creative Commons license specifies the extent to which the work can be re-used by the scientific community and the general public. Publishing under a Creative Commons license means that the authors retain the copyright, and the publisher receives non-exclusive exploitation rights. The permitted reuse of gold open access articles by third parties is determined by the usage license.

The author confirms that they have already acquired all necessary rights for all components of the work in the event of an open access publication. For more information, refer to paragraph 5 in the [License to Publish](#).

## Article Processing Charges (APCs)

Authors publishing in hybrid journals do not have to pay APCs if they do not wish to publish their article open access. After acceptance and before production of an article, authors can decide whether to publish their article open access. Only if they decide to publish open access, APCs will be charged. All articles are peer-reviewed and accepted for publication based on the quality of their scientific contribution. The decision to publish open access does not affect the peer review process or the acceptance of the article. The publisher has [institutional agreements](#) in place that allow authors to publish open access articles at no cost – or with a significant discount. Please read our [Open Access Policies](#) for detailed information.

## Open access articles on ResearchGate

The publisher partners with ResearchGate to deposit the Version of Record of all our gold open access articles with ResearchGate. If you have a profile on ResearchGate and you have published your article open access, it will automatically appear in your profile on publication. For more information about ResearchGate and setting up a profile visit [What is my Profile? – ResearchGate](#).

## Ethical conduct of research

**Manuscripts must follow certain ethical guidelines** to be considered for publication, which can be found in the [Publication Ethics and Malpractice Statement](#). Accordingly, **before submitting your manuscript, please make sure that you and your co-authors agree to the applicable requirements**. For example, this may involve declaring and ruling out conflicts of interest or proving compliance with legal requirements related to human and animal testing.



Furthermore, our [Code of Conduct for Publication Procedures and Ethics](#) defines the responsibility of the publisher and the Editors we work with, to ensure the legitimacy and quality of our published research. Our principles are based on the guidelines of the [Committee on Publication Ethics \(COPE\)](#).

### **Acknowledgments**

Authors may wish to acknowledge individuals, working groups, institutions, etc. who provided help and support (other than financial) during research and the preparation of the manuscript (e.g., language checking, writing assistance or proof reading of the article, etc.). Individuals acknowledged are not included on the title page, as a footnote to the title or otherwise.

Acknowledgements should be given in the [Template for Ethical and Legal Declarations](#), if required for submission.

### **Authorization for the use of human subjects – Research ethics**

Manuscripts that contain information on the use of humans should clearly state that the research complies with all relevant national regulations and institutional policies and has been approved by the authors' Institutional Review Board or any equivalent committee. Copies of the guidelines and policy statements must be provided during submission for review by the Editor, if applicable. The Editors reserve the right to seek additional information or guidance from reviewers on any cases in which concerns arise. All investigations with human subjects must be conducted by following the tenets of the [Declaration of Helsinki](#). Authors must identify the Committee or Institutional Review Board approving the experiments and provide a statement indicating approval of the research. If applicable, information on research ethics and/or approval by the Institutional Review Board should be given in the Methods section.

In addition, information on research ethics should also be given in the [Template for Ethical and Legal Declarations](#), if required for submission. Please make sure that the information in the manuscript matches the information in the template.

### **Authorization for the use of experimental animals and wildlife in natural settings – Research ethics**

Manuscripts that contain information on the use of animals should clearly state that the research has complied with all relevant national regulations and institutional policies and has been approved by the authors' Institutional Review Board or any equivalent committee. Copies of the guidelines and policy statements must be provided during submission for review by the Editor, if applicable. The Editors reserve the right to seek additional information or guidance from reviewers on any cases in which concerns arise. The research using animal subjects should be conducted according to the Principles of Laboratory Animal Care and similar documents (e.g. [NIH](#)). For manuscripts reporting experiments on live vertebrates or higher invertebrates, authors must identify the Committee approving the experiments, and must confirm that all experiments were performed in accordance with relevant regulations. For research involving wildlife in natural settings, authors must have obtained an Institutional Animal Care approval and state that they have complied with the relevant national, international, and institutional guidelines regarding the ethical treatment of the taxa of study and cite them. If applicable, information on research ethics and/or approval by the Institutional Review Board should be given in the Methods section.

In addition, information on research ethics should also be given in the [Template for Ethical and Legal Declarations](#), if required for submission. Please make sure that the information in the manuscript matches the information in the template.

If a study did not require human or animal ethical approval, a corresponding statement should be given in the Methods section. In addition, this statement should also be given in the [Template for Ethical and Legal Declarations](#), if required for submission. Please make sure that the information in the manuscript matches the information in the template.

### **Informed consent**

The [Protection of Privacy](#) is a legal right that must not be infringed without individual informed consent. In cases where the identification of personal information is necessary for scientific reasons, authors should obtain full documentation of informed consent, including written permission from the patient or their legal guardians prior to inclusion in the study. The following (or similar) statement should be given in the Methods section: Informed consent was obtained from all individuals included in this study.

In addition, information on informed consent should also be given in the [Template for Ethical and Legal Declarations](#), if required for submission. Please make sure that the information in the manuscript matches the information in the template.

### **Author contributions**

In view of research integrity, authorship is generally confined to an individual who has made a substantial intellectual or practical contribution to the conception or design of the project or the acquisition, analysis, or interpretation of data for the work of a publication and/or has drafted the work or reviewed/revised it critically for important intellectual content. The individual(s) listed as author(s) must agree to be accountable for said contribution and approve of the final version. Honorary authorship is not allowed.

Individuals who helped or participated in certain substantive aspects of the project or work (e.g., technical services staff), but whose contributions were not of sufficient extent to be listed as co-authors, should be appropriately acknowledged, usually in an Acknowledgements section.

We do not accept submissions that name Large Language Models, such as ChatGPT, Artificial Intelligence (AI) and Machine Learning Tools as credited author(s) on a manuscript because such tools cannot take responsibility for the submitted work and therefore cannot be considered as eligible authors.

Authors must declare their responsibility for the entire content of the manuscript and may indicate the individual contributions of each author, if applicable. The information on author contributions should be given in the [Template for Ethical and Legal Declarations](#), if required for submission.

### **Conflict of interest**

A conflict of interest for a particular manuscript exists when a participant in the peer review and publication process – author, reviewer, and editor – has ties to activities that could inappropriately influence their judgment, regardless of whether the judgment is actually affected. Financial relationships with industry (for example, employment, consultancies, stock ownership, honoraria, patent applications, expert testimony, grants, and other funding), either directly or through immediate family, are usually considered the most important conflicts of interest. However, conflicts can occur for other reasons, such as financial support of the study, ties to health insurance, politics or other stakeholders, personal relationships, academic competition, and intellectual passion.

To ensure fair and objective decision-making, authors must declare any associations that pose a conflict of interest (financial, personal, or professional) in connection with the manuscript under evaluation.

The conflict-of-interest statement should be given in the [Template for Ethical and Legal Declarations](#), if required for submission.

### **Research funding**

Funding sources should be given in the [Template for Ethical and Legal Declarations](#), if required for submission. When the study benefitted from funding through an unrestricted grant or other resources provided to a university, college, other research institution, or an individual author, state the name of the institute or organization that provided the funding along with the grant number, if applicable.

If no funding was provided for the research, the default statement will be set in place: *None declared*.

### **Please contact the Journal Coordinator for any further questions:**

Name: Agata Józefowska

Email: [agata.jozefowska@degruyter.com](mailto:agata.jozefowska@degruyter.com)
